# Supplementary material for: Experiences of menstruation in high income countries: A systematic review, qualitative evidence synthesis and comparison to low- and middle-income countries
Source: PubMed Central journal article supplement (PMC8294489; doi:10.1371/journal.pone.0255001), 2021-07-21
Supplement: pone.0255001.s002.pdf [file pone.0255001.s002.pdf]

**S1 Text: Organisational and personal websites searched.** Identified via members of the Menstrual Health Hub (<https://mhhub.org/community/global-mh-registry/>) and partners of Menstrual Hygiene Day (<https://menstrualhygieneday.org/get-involved/partnership/>). Searched in September 2019 and updated in November 2020.

|                                                                                         |                                                               |                                                                 |
|-----------------------------------------------------------------------------------------|---------------------------------------------------------------|-----------------------------------------------------------------|
| "Monthlies" (Viafilm)                                                                   | Cora Women                                                    | Fields of Life                                                  |
| #HappyPeriod                                                                            | Cotton Candy Eco Cloth                                        | Fierce Coast Folks                                              |
| 28 Too Many                                                                             | CouldYou                                                      | Flying Inspiration                                              |
| 50 Cents. Period                                                                        | Crafts and Cramps                                             | Freedom4girls                                                   |
| Adventures in Menstruation                                                              | CrankyTown                                                    | Fullfilling Destiny                                             |
| Advice to My Thirteen-Year-Old Self                                                     | Crown Abbey LLC                                               | Gashtrays and Venus Libido                                      |
| Always                                                                                  | Cuptime                                                       | Gifti                                                           |
| Asociación de Mujeres para la Salud                                                     | Cute Cotton                                                   | Girl Guiding                                                    |
| Aunt Flow                                                                               | Cycle Seeds                                                   | Girls Flow Free Girlsflowfree.org                               |
| ayzh Inc                                                                                | CYCLO Menstruación Sostenible                                 | Girls Globe                                                     |
| Be Girl                                                                                 | Danish School of Education, Aarhus University                 | Girls Health Ed                                                 |
| Be Prepared. Period                                                                     | Dans Ma Culotte                                               | Give Grace, Give Hope                                           |
| Beauty in Blood                                                                         | Day of the Girl Summit                                        | Glad Rags                                                       |
| Beppy Canada                                                                            | Days for Girls                                                | Global Communities                                              |
| Betty for Schools                                                                       | Days for girls, Peebles and Thondwe Partnership               | Global Health Initiative                                        |
| big love sista                                                                          | Diva International Inc.                                       | Go With Your Flow                                               |
| Binti International                                                                     | Do It Now NOW                                                 | Grace & Green                                                   |
| Birmingham City University                                                              | Earth Conscious                                               | Graduate Women international                                    |
| Bloody Good Period                                                                      | easy.                                                         | Grand Challenges Canada                                         |
| Body form                                                                               | ECO-SER /Menstrupedia Comic Español                           | Guam Girl Scouts                                                |
| BodyLogic                                                                               | École polytechnique fédérale de Lausanne (EPFL) (Laura Symul) | Hands on Wellness / CycleBloom                                  |
| Bright Girl Health                                                                      | Edinburgh Napier University                                   | Happeriod                                                       |
| Brown Girl Magazine & The Desai Foundation                                              | El Camino Rubí and Soy1Soy4                                   | Happy Cup                                                       |
| Brown University                                                                        | Emily Cherenack                                               | Harmonie Ženy - Jana Urbánková                                  |
| Callaly                                                                                 | Empowering Women. Period                                      | Harvest Market Natural                                          |
| Capezio                                                                                 | End Poverty Now                                               | Hello Flo                                                       |
| Casco Bay Molding                                                                       | EndoActive                                                    | Helping Women Period                                            |
| Catapult                                                                                | ENDOMETRIOSIS ASSOCIATION                                     | Hempact                                                         |
| Celebrate Puberty Inc.                                                                  | erdbeerwoche GmbH                                             | Hey Girls UK                                                    |
| Celebration Day for Girls                                                               | Eva Teja                                                      | Hope and Dreams Initiative                                      |
| Center for Endometriosis Care                                                           | Evofem (SoftCup)                                              | Human Rights Watch <a href="http://www.hrw.org">www.hrw.org</a> |
| Center For Erotic Intelligence                                                          | Face Of winter Netherlands                                    | I Support the Girls                                             |
| Central Australian Youth Link-Up Service                                                | False Labels Global Inc                                       | I-Care                                                          |
| Cho Ngafor's Vocational Foundation                                                      | Feby Empowerment Inc.                                         | Institute for the Study of Human Rights, Columbia University    |
| Círculo Perfeito                                                                        | Female Cup                                                    | IntiMate Initiative                                             |
| Claripharm                                                                              | FemCap, Inc.                                                  | Irise International                                             |
| Clean Your Cup                                                                          | FEMFLOW                                                       | Itwixie                                                         |
| Clue                                                                                    | Feminesse                                                     | Journalists for Human Rights                                    |
| CoMo                                                                                    | Feminine Wear Ltd                                             | Ju Ju Menstrual Cup                                             |
| Confraria Vermelha                                                                      | FemmyCycle                                                    | Kærlig hilsen Underlivet                                        |
| Conscious Period - <a href="http://www.consciousperiod.com">www.consciousperiod.com</a> | Fertilidade Natural                                           | Keela                                                           |
| Coppetta Menstruale                                                                     |                                                               | Kindara                                                         |

|                                                                              |                                                                    |                                                  |
|------------------------------------------------------------------------------|--------------------------------------------------------------------|--------------------------------------------------|
| Kliit Health                                                                 | Mother Nature Partnership                                          | Rose Temple Yoni Steaming                        |
| Kora Mikino                                                                  | Moxie                                                              | Rowe Clark H.S.                                  |
| Korean Women's Environmental Network                                         | My Best Period                                                     | Ruby Cup by Ruby Life Ltd.                       |
| La Source des Femmes                                                         | My Puberty Party                                                   | Ruby May                                         |
| Ladybug for Girls Foundation, Inc.                                           | My.flow                                                            | Sara Lopez & Gush                                |
| Lara Owen                                                                    | MYLILY                                                             | Scensible Bags                                   |
| Let's Talk Period Network (project by Brook and Plan International UK)       | Nashiuti                                                           | Scottish Government                              |
| Lil-lets                                                                     | Natracare <a href="http://www.natracare.com">www.natracare.com</a> | Share the Dignity                                |
| Liverpool John Moores University Students Union                              | Natural Flow                                                       | Shove it in your Vagina                          |
| Liz Granger <a href="http://www.lizgranger.com">www.lizgranger.com</a>       | New Moon Pads                                                      | Silvana Rigobon                                  |
| Lotus Liners                                                                 | No More Taboo                                                      | Simply the Basics                                |
| Love Cherish                                                                 | Northwestern University Feinberg School of Medicine                | Sister of Flow                                   |
| Love Your Cycle – Helsinki                                                   | NY Assembly                                                        | Smart Health aka Superlizzy                      |
| Love&Cherish                                                                 | Odeeva                                                             | Social Good Moms                                 |
| Luna Menstrual Health                                                        | Ohnut <a href="http://www.ohnut.co">www.ohnut.co</a>               | Society for Menstrual Cycle Research             |
| Luna Pads                                                                    | One-Fertility                                                      | Soy1Soy4.com                                     |
| Lunar Circle                                                                 | Ooshi GmbH                                                         | Sport England                                    |
| Lunaspongia                                                                  | OrganiCup / Peace with the world                                   | State of WI Legislature                          |
| Lunette                                                                      | PadBack                                                            | Sustainable Cycles                               |
| Macheo                                                                       | Party in My Pants                                                  | Sustainable Sanitation Alliance                  |
| Marie Stopes International                                                   | Penny Pack                                                         | Sylvia's Sisters                                 |
| Matronas Amane (Amane Midwives)                                              | Perfectly packaged you                                             | Talking Periods                                  |
| Maxim Hygiene Products                                                       | PERIOD - The Menstrual Movement                                    | Tanya Dhingra                                    |
| Medulla - wild cycles for wise women                                         | Period Colouring Book                                              | Tenda Vermelha                                   |
| Meloniesyre                                                                  | Period Equity                                                      | Terram Pacis                                     |
| Menkoppen                                                                    | Period Packs, Inc.                                                 | The Agenda                                       |
| Mensen - forum för menstruation                                              | Period Panteez                                                     | The Better Period                                |
| Menskoppen                                                                   | Period Partner                                                     | The Blobcast                                     |
| Menstrual Cup Co                                                             | Period Positive                                                    | The Butterfli Effect                             |
| Menstrual Health Hub Hive                                                    | Period Talks                                                       | The Circle                                       |
| Menstrual Hygiene Day Resources                                              | Period!                                                            | The Crimson Movement                             |
| Menstrual Matters                                                            | PHS Group Period Poverty Collective                                | The Cuntsultant                                  |
| Menstruation Museum Amsterdam                                                | PHSE Association                                                   | The Cup                                          |
| Menstruation Research Network (and individual websites of members)           | Plan Australia                                                     | The Cup Effect                                   |
| MenstruationMatters                                                          | Plan International                                                 | The Female Company                               |
| MenstruationsNetzwerk                                                        | Plan UK                                                            | The Flex Company                                 |
| Mensual                                                                      | Plan Ireland                                                       | The Flow Menstrual Cycle App                     |
| MINT-E (menstrual information network teaching and empowerment project)      | Poculum                                                            | The Healthy Womb                                 |
| ModiBodi                                                                     | POWER:Period.                                                      | The intiMate Initiative UG (haftungsbeschraenkt) |
| Mondays - <a href="http://www.organicmondays.com">www.organicmondays.com</a> | Power2theWomb!                                                     | The Kota Alliance                                |
| MonthlyCup AB <a href="http://www.menstrualcup.com">www.menstrualcup.com</a> | Precious Gems                                                      | The Monthly: a project of DC Diaper Bank         |
| Moon + Womb                                                                  | Primal Wisdom                                                      | The Moon in Our Blood                            |
| Mooncatcher                                                                  | Project GIVE                                                       | The Period Project                               |
| Mooncup                                                                      | Project Humanity                                                   | The Period Purse                                 |
| Moontime Harmony                                                             | Project Pink Compassion                                            | The Period Store                                 |
|                                                                              | Red School                                                         | The Real Period Project                          |
|                                                                              | Red School Ltd                                                     | The Red Box Project                              |
|                                                                              | Rethinking Eve                                                     |                                                  |

The Red Elephant  
The Red Web  
The Red Web Foundation  
The University of Queensland  
The Waratah Project  
Thieut Inc.  
Thinx  
This is a tampon - instagram handle  
Time of the Month (TOTM)  
Top Organic  
Transparent Heart  
Tsuno  
Two Rags  
UhuruPads  
UK government's period poverty task force  
UN Women  
UNFPA  
UNICEF  
Unite Youth Dublin Activist Group  
University of Illinois at Chicago  
University of Leeds  
Untabooed  
Valley Electronics AG (Daysy)  
VrouwenBron  
Wā Collective  
WASH Canada  
WASH United  
WaterAid  
We-Stap  
Woman Care Global  
Women and Girls  
Women For Independence  
Women in Sanitation and Health "WISH"  
Women on Wings  
Women's Environmental Network (WEN)  
Women's Global Health Innovations  
WoMena Denmark  
WonderCup  
World Menstrual Network  
World Pulse  
Yoga Buds, Yoga Blossoms, Yoga Flowers  
Yoni  
Young Jewels Foundation  
Your Sacred Cycle  
Zyklusachtsamkeit
