# Supplementary material for: Experiences of menstruation in high income countries: A systematic review, qualitative evidence synthesis and comparison to low- and middle-income countries
Source: PubMed Central journal article supplement (PMC8294489; doi:10.1371/journal.pone.0255001), 2021-07-21
Supplement: pone.0255001.s003.pdf [file pone.0255001.s003.pdf]

## S2 Text: Menstrual health researchers contacted directly (October 2019 and November 2020)

Milena Bacalja  
Bettina Bildhauer  
Christina Bobel  
Chris Bonell  
Liita N. Cairney  
Marisa Carnesky  
Ruth Cochrane  
Sara De Benedictis  
Nina Hall  
Celia Hodson  
Bee Hughes  
Tania John  
Ina Jurga  
Danielle Keiser  
Sally King  
Victoria Newton  
Lara Owen  
Penny Phillips-Howard  
Carrie Purcell  
Kate Rahnejat  
Emma Ross  
Camilla Mørk Røstvik  
Kate Sang  
Kelly Shephard  
Marni Sommer  
Kay Standing  
Emily Stewart  
Jane Ussher  
Rachel Vette  
Katy Vincent  
Shailini Vora  
Pamela Warner  
Annalise Weckesser  
Helen Weiss  
Gemma Williams  
Inga Winkler  
Sarah Zipp

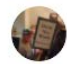

Dr Dani Barrington 🍷 🍷  
@Dani\_Barrington

Have you written (or read) a qualitative, primary study on [#menstrual](#) experiences in high income countries that was published in 2020? If so, please link below for us to include it when updating our systematic review (protocol here: [crd.york.ac.uk/PROSPERO/displ...](http://crd.york.ac.uk/PROSPERO/displ...)) [#MenstruationMatters](#)

### Experiences of menstruation in high income countries: a systematic review and comparison to low- and middle-income countries

#### Objectives:

1. Systematically identify existing qualitative studies of experiences of menstruation in high-income countries.
2. Describe and synthesise menstrual experiences, including: management behaviours; the impact of menstruation on lives; and the factors contributing to menstrual experiences.
3. Analyse and interpret the current body of literature using thematic analyses and visual representations to draw new insights, and to contribute to the emerging conceptual frameworks of menstrual health.
4. Compare menstrual experiences in high-income countries to those in low- and middle-income countries (as detailed in Hennegan et al 2019), so as to better understand the similarities and differences
5. Compare the types of qualitative studies of menstrual experiences in high-income countries to those in low- and middle-income countries (as detailed in Hennegan et al 2019)

Julie Hennegan and 2 others

11:48 AM · Nov 9, 2020 · Twitter Web App
